1 Comparative genomics of two closely related coral species with different spawning

2 seasons reveals genomic regions possibly associated with gametogenesis

3

4 Shiho Takahashi-Kariyazono<sup>a, b\*</sup>, Akira Iguchi<sup>a, c</sup>, Yohey Terai<sup>b\*</sup>

5 <sup>a</sup> Geological Survey of Japan, National Institute of Advanced Industrial Science and

6 Technology (AIST), Tsukuba, Ibaraki, Japan

7 <sup>b</sup> SOKENDAI (The Graduate University for Advanced Studies), Research Center for

8 Integrative Evolutionary Science, Hayama, Kanagawa, Japan

9 <sup>c</sup> Research Laboratory on Environmentally-Conscious Developments and Technologies

10 [E-code], National Institute of Advanced Industrial Science and Technology, Ibaraki 305-

11 8567, Japan

12

13 \*Corresponding authors: S. Takahashi-Kariyazono and Y. Terai, SOKENDAI (The

14 Graduate University for Advanced Studies), Research Center for Integrative Evolutionary

15 Science, Shonan Village, Hayama, Japan, +81-46-858-1572, [terai\\_yohei@soken.ac.jp](mailto:terai_yohei@soken.ac.jp);

16 [kariyazono.s@aist.go.jp](mailto:kariyazono.s@aist.go.jp)

17 **Abstract**

18 Marine invertebrates release their gametes at an optimal time to produce the next  
19 generation. In reef-building scleractinian corals, synchronous spawning is essential for  
20 reproductive success. Molecular mechanisms of scleractinian gametogenesis have been  
21 studied; however, the mechanism by which coral gametes mature at specific times has  
22 yet to be discovered. The present study focused on two *Acropora* species with different  
23 spawning seasons. In Okinawa, Japan, *Acropora digitifera* spawns from May to June,  
24 whereas *Acropora* sp. 1 spawns in August. Comparative genomic analyses revealed that  
25 39 candidate genes are differentiated between the two species, suggesting a possible  
26 association with timing of gametogenesis. Among candidate genes, we identified an  
27 *Acropora* sp. 1-specific amino acid change in gene *WDR59*, one of the components of a  
28 mTORC1 activator, GATOR2. Since regulation of gametogenesis by mTORC1 is widely  
29 conserved among eukaryotes, the difference in timing of gamete maturation observed in  
30 the two *Acropora* species may be caused by a substitution in *WDR59* that slightly affects  
31 timing of mTORC1 activation via GATOR2. In addition, this substitution may lead to  
32 reproductive isolation between the two species, due to different spawning periods. Thus,

33 we propose that *A. digitifera* and *Acropora* sp. 1 species pair is an effective model for  
34 studying coral speciation and understanding the molecular mechanisms that control coral  
35 spawning timing.  
36

37 ***Significance statement (required):***

38 For successful coral reproduction, conspecific corals must spawn synchronously. Gamete  
39 production initiates coral spawning. Regulation of gamete maturation by a protein  
40 complex, mTORC1, is widely conserved among organisms, but little is known about it in  
41 cnidarians. In this study, we analyzed genomes of two closely related *Acropora* species  
42 with different spawning months, May/June and August. Our analyses revealed that 39  
43 genes are genetically differentiated between the two species. One of these is a component  
44 of mTORC1 activator, suggesting that this gene may be associated with the difference in  
45 spawning times of these two species.

46

47

48 *Key words: mTORC1, oogenesis, cnidaria*

49

## 50 **Introduction**

51 In marine invertebrate reproduction, gametes are released into the water to be fertilized  
52 externally (spawning) (Mercier and Hamel 2010). Spawning occurs at an optimal time to  
53 produce the next generation (Forrest and Miller-Rushing 2010). Since fertilization in  
54 seawater can easily fail due to sperm dilution and other factors, marine organisms have  
55 evolved mechanisms such as synchronized spawning (Fukami, et al. 2003; Levitan, et al.  
56 2004).

57 Spawning in reef-building, scleractinian corals is one of the most massive  
58 reproductive events on earth. In the Great Barrier Reef, most corals release their gametes  
59 once a year for a few nights (Harrison, et al. 1984). For example, over 100 coral species  
60 spawn in the Great Barrier Reef between the full and last quarter moon in late spring  
61 (Babcock, et al. 1986). Synchronous spawning within species is essential for fertilization  
62 because dilution and aging of sperm reduce fertilization success (Fukami, et al. 2003;  
63 Levitan, et al. 2004). In synchronous spawning, gametes spawned by different species are  
64 present in the water and may encounter each other. However, many *Acropora* species  
65 exhibit species specificity in gamete compatibility (Hatta, et al. 1999; Willis, et al. 1997),

66 and interspecific hybridization rarely occurs in the Indo-Pacific (Hatta and Matsushima  
67 2008; Isomura, et al. 2013).

68           Environmental cues act on corals to regulate spawning months, days, and times  
69 (Babcock, et al. 1986; Baird, et al. 2009). Temperature strongly influences gamete  
70 maturation (Baird, et al. 2009), and in several coral species, spawning has become  
71 asynchronous, due to effects of recent climate change (Shlesinger and Loya 2019).  
72 Therefore, understanding mechanisms of synchronous gamete maturation will help us  
73 estimate the impact of climate change on coral reproduction and restoration using coral  
74 seedlings produced from gametes (Suzuki, et al. 2020). Gametogenesis in corals has been  
75 studied in the field (Harrison 2011) and by molecular biological approaches (Chiu, et al.  
76 2020; Shikina and Chang 2016). However, the mechanism by which coral gametes mature  
77 at specific times has yet to be identified.

78           In the Indo-Pacific region, including Okinawa, Japan, the genus *Acropora*  
79 comprises the largest number of coral species (Veron 2000). In Okinawa, most *Acropora*  
80 species spawn around the full moon in May or June, with a few species spawning several  
81 months later (Hayashibara, et al. 1993). One species that spawns later is *Acropora* sp. 1.

82 This species was initially classified as *Acropora digitifera* (Wallace 1999); however, the  
83 two are now recognized as separate species, due to differences in morphology and  
84 spawning time (Hayashibara and Shimoike 2002; Nakajima, et al. 2012; Ohki, et al. 2015).  
85 *Acropora* sp. 1 has a flatter colony shape and shorter branches than *A. digitifera*  
86 (Hayashibara and Shimoike 2002; Ohki, et al. 2015). *Acropora* sp. 1 tends to inhabit reef  
87 edges with faster (offshore) currents than *A. digitifera*. In addition, in Okinawa, *A.*  
88 *digitifera* spawns from May to June, whereas *Acropora* sp. 1 spawns in August  
89 (Hayashibara and Shimoike 2002). Gametes of both species can cross-fertilize as  
90 indicated by artificial fertilization experiments (Ohki, et al. 2015). Under natural  
91 conditions, however, the two species do not interbreed because of the different spawning  
92 months (Ohki, et al. 2015).

93 Advances in analysis of genomic data with next-generation sequencers have  
94 revealed the genetic basis of specific traits (Ellegren and Sheldon 2008). In particular,  
95 comparative genomic analyses between genetically close species have identified genomic  
96 regions associated with their phenotypic differences (Poelstra, et al. 2014; Turner, et al.  
97 2005). So far, genomes of various corals have been sequenced (Fuller, et al. 2020;

98 Shinzato, et al. 2021; Shinzato, et al. 2011; Voolstra, et al. 2015), and population genomic  
99 approaches have identified loci associated with heat tolerance (Smith, et al. 2022).  
100 Comparative genomic analysis has yet to be conducted to identify genomic regions  
101 associated with differences in coral spawning timing due to the lack of closely related  
102 species pairs to compare.

103           In this study, we performed a comparative genomic analysis between *A.*  
104 *digitifera* and *Acropora* sp. 1 to identify genomic regions likely involved in trait  
105 differences between them. We expected that *A. digitifera* and *Acropora* sp. 1 were  
106 genetically closely related based on analysis of short sequences (Nakajima, et al. 2012)  
107 and their fertilization ability (Ohki, et al. 2015). Therefore, we determined the genome  
108 sequences of both species. This comparative genomic analysis identified genomic regions  
109 likely associated with differences in their spawning times. Since differences in spawning  
110 time can lead to reproductive isolation, these species will be a useful model to study coral  
111 speciation and to understand molecular mechanisms that regulate spawning time in corals.

112

113 **Results**



114 ***The spawning month of Acropora sp. 1***

115 We collected 16 *Acropora sp. 1* colonies during 2018-2020 at Sesoko and Bise, Okinawa,  
116 Japan (Fig.1), and observed mature oocytes or spawning in August (Table S1). This later-  
117 spawning month of *Acropora sp. 1* is consistent with previous observations (Hayashibara  
118 and Shimoike 2002; Nakajima, et al. 2012; Ohki, et al. 2015).

119

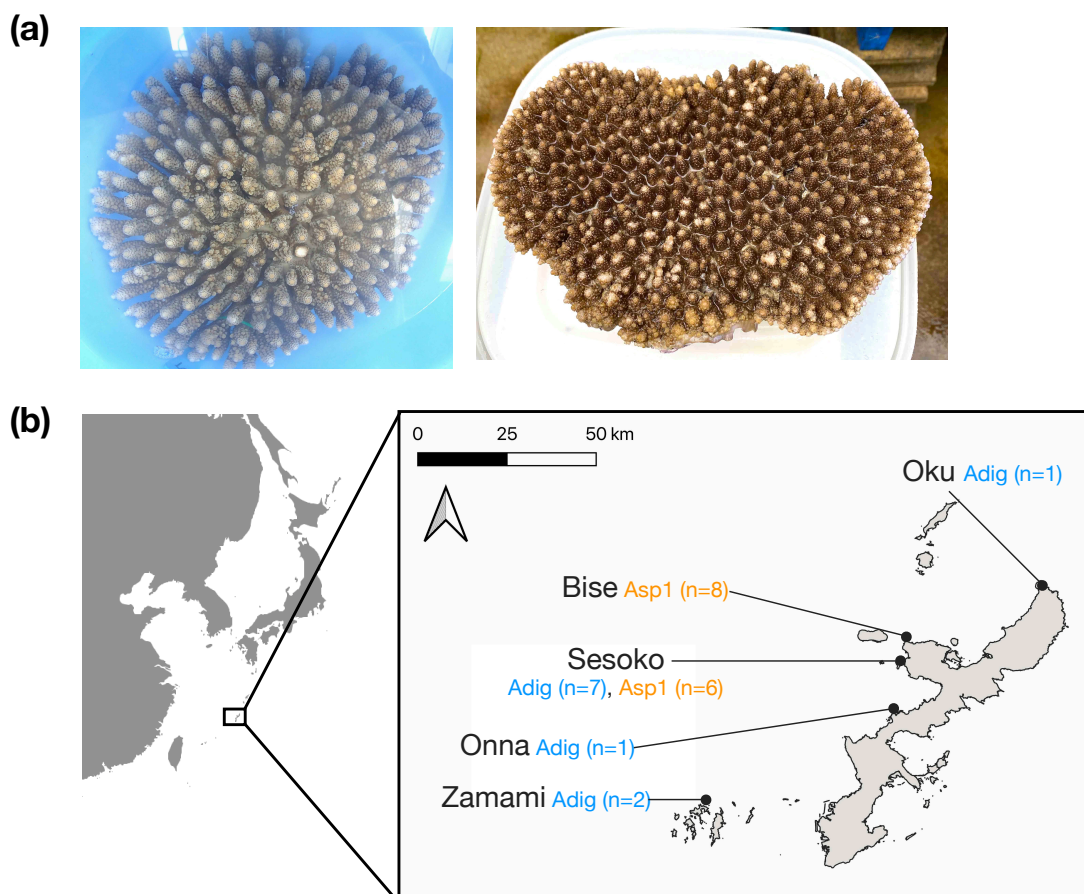

120

121 Figure 1

122 ***Phylogenetic tree and principal component analysis***

123 We sequenced genomes from 16 colonies of *Acropora* sp. 1 (Table S1). Then, we mapped  
124 these reads to the *A. digitifera* whole-genome assembly ver. 2.0 (Shinzato, et al. 2021)  
125 and selected 14 colonies with coverage >10x for analyses. In addition, we downloaded  
126 genomic sequence data for 11 colonies of *A. digitifera* and one colony each of 15 other  
127 *Acropora* species from the DNA Data Bank of Japan (DDBJ) and mapped them as well.

128 First, we investigated the genetic relationship between *A. digitifera* and  
129 *Acropora* sp. 1. We extracted 885,405 biallelic single-nucleotide polymorphisms (SNPs)  
130 from mapping data of 17 species using our criteria (Materials and Methods). With these  
131 SNPs, we constructed a phylogenetic tree (Figure 2a). *Acropora digitifera* and *Acropora*  
132 sp. 1 colonies formed a monophyletic clade. In this clade, *A. digitifera* and *Acropora* sp.  
133 1 colonies each formed monophyletic clades. A monophyletic *A. digitifera*/*Acropora* sp.  
134 1 clade formed a monophyletic clade with *A. acuminata*, *A. microphthalma*, and *A. nasuta*  
135 (Fig. 2a). Using five species in this monophyletic clade, we performed principal  
136 component analysis (PCA). We used 80,490 SNPs extracted from *A. digitifera*, *Acropora*  
137 sp. 1, and three out-group species (*A. acuminata*, *A. microphthalma*, and *A. nasuta*). The

138 three out-group species were separated along the PC1 axis from *A. digitifera* and  
139 *Acropora*. sp. 1 colonies, forming distinct genetic clusters. *Acropora digitifera* colonies  
140 were separated from *Acropora* sp. 1 along the PC2 axis (Fig. 2b). Among *Acropora* sp. 1  
141 colonies, two (Colony IDs: Asp1B1906 and Asp1B1904) were separated from other  
142 *Acropora* sp. 1 colonies by PCA. In addition, these two colonies (Colony IDs:  
143 Asp1B1906 and Asp1B1904) formed a single clade with high bootstrap support in the  
144 phylogenetic tree (Fig. 2a). These two colonies were sampled from the same sites as other  
145 colonies sampled in the same year, indicating no geographic isolation.

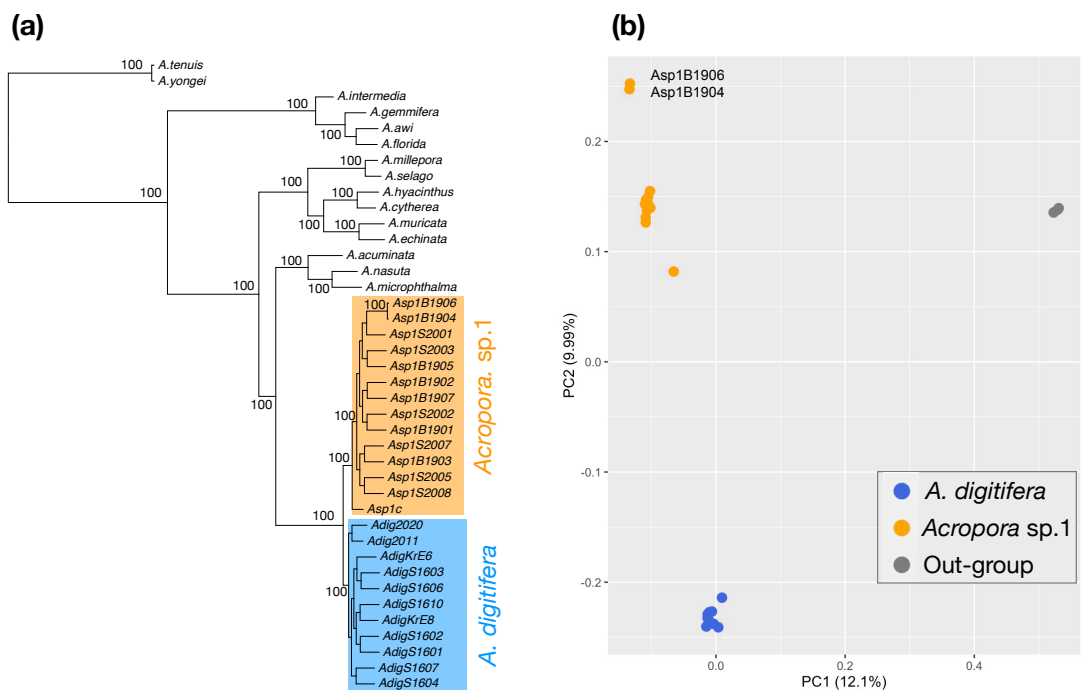

146

147

Figure 2

148 ***Highly differentiated regions between *A. digitifera* and *Acropora* sp. 1***

149 Since phylogenetic analysis indicated that *A. digitifera* and *Acropora* sp. 1 are closely  
150 related, the degree of differentiation between the two species was calculated ( $F_{ST}$ ) (Weir  
151 and Cockerham 1984) using 1,459,328 SNPs. The  $F_{ST}$  (Weir and Cockerham 1984) value  
152 across the genomes of these two species was 0.10225. This is comparable to the genetic  
153 divergence of species pairs used in comparative genome analysis in previous studies  
154 (Ellegren, et al. 2012; Geraldles, et al. 2011; Nadeau, et al. 2013). Despite low  
155 differentiation throughout their genomes, genomic regions responsible for differences in  
156 traits between *A. digitifera* and *Acropora* sp. 1 are expected to differ in the two species.  
157 To extract differentiated regions, we performed a sliding window analysis of 10 kb in  
158 1 kb increments between *A. digitifera* and *Acropora* sp. 1. Genomic regions with the top  
159 0.1%  $F_{ST}$  (Hudson, et al. 1992) values ( $F_{ST} > 0.6157$ ) in each 10 kb window were then  
160 selected. We further selected windows containing differentiated SNPs (Materials and  
161 Methods) from the top 0.1%  $F_{ST}$  (Hudson, et al. 1992) windows. When these windows  
162 overlapped, they were combined. As a result, 34 genomic regions, called highly  
163 differentiated regions (HDRs) (Table S2), were extracted from the whole genome.

164

165 ***Genes in highly differentiated regions***

166 In the HDRs, 39 genes harbor differentiated SNPs. We performed a Blast search using  
167 these 39 genes as queries (Figure S1) and found that 23 of them are similar to high-quality  
168 manually annotated genes (Table 1). Ten genes are similar to genes with automated  
169 annotations related to known genes (Table S3). Four genes are similar to uncharacterized  
170 genes (Table S3), and two genes have no similarity to any others in the NCBI nucleotide  
171 database.

172 Table 1

| Gene ID            | Protein Name (Uniprot Reviewed)  | Identity (%) | E-value  | Entry  |
|--------------------|----------------------------------|--------------|----------|--------|
| adig_s0002.g57.t1  | Growth/differentiation factor 11 | 29.6         | 2.6E-35  | Q9Z217 |
| adig_s0002.g67.t1  | Nipped-B-like protein A          | 26.1         | 5.1E-15  | F5HSE3 |
| adig_s0002.g68.t1  | Kelch-like protein diablo        | 41           | 5.9E-122 | B0WWP2 |
| adig_s0013.g139.t1 | Transcription factor Atoh1       | 27.9         | 9.6E-08  | P48985 |
| adig_s0013.g67.t1  | Stromelysin-2                    | 28.6         | 6.3E-17  | O55123 |

|                    |                                                                 |      |       |        |
|--------------------|-----------------------------------------------------------------|------|-------|--------|
| adig_s0015.g100.t1 | RNA-binding motif protein, X                                    | 35   | 3.8E- | Q6IRQ4 |
|                    |                                                                 |      | 40    |        |
| adig_s0015.g101.t1 | Glycine-rich RNA-binding protein 2                              | 58.1 | 9.5E- | Q99070 |
|                    |                                                                 |      | 52    |        |
| adig_s0020.g143.t1 | -                                                               | -    | -     | -      |
| adig_s0028.g24.t1  | -                                                               | -    | -     | -      |
| adig_s0034.g150.t1 | Collectin-12                                                    | 49.2 | 3.9E- | Q4V885 |
|                    |                                                                 |      | 07    |        |
| adig_s0034.g151.t1 | Collagen alpha-1(XVI) chain                                     | 46.2 | 1.3E- | Q07092 |
|                    |                                                                 |      | 05    |        |
| adig_s0042.g174.t1 | Inactive tyrosine-protein kinase<br>transmembrane receptor ROR1 | 31.5 | 2.3E- | Q9Z139 |
|                    |                                                                 |      | 99    |        |
| adig_s0046.g74.t1  | -                                                               | -    | -     | -      |
| adig_s0048.g28.t1  | GATOR complex protein WDR59                                     | 42.1 | 0     | Q6PJI9 |
| adig_s0048.g29.t1  | Guanine nucleotide-binding protein G(o)<br>subunit alpha        | 72.6 | 0     | P08239 |
| adig_s0058.g4.t1   | -                                                               | -    | -     | -      |
| adig_s0064.g90.t1  | Putative nucleotidyltransferase MAB21L1                         | 23.4 | 3.8E- | Q0V9X7 |
|                    |                                                                 |      | 06    |        |
| adig_s0064.g91.t1  | Survival of motor neuron-related-splicing<br>factor 30          | 50.5 | 7.8E- | Q4QQU6 |
|                    |                                                                 |      | 20    |        |
| adig_s0064.g92.t1  | Probable N-acetyltransferase CML1                               | 35.9 | 4.3E- | Q9JIZ0 |
|                    |                                                                 |      | 23    |        |
| adig_s0087.g2.t1   | Zinc finger protein 862                                         | 26.6 | 2E-   | O60290 |
|                    |                                                                 |      | 06    |        |
| adig_s0087.g3.t1   | Pogo transposable element with KRAB<br>domain                   | 38.7 | 1.3E- | Q9P215 |
|                    |                                                                 |      | 91    |        |

|                   |                                                       |      |          |          |
|-------------------|-------------------------------------------------------|------|----------|----------|
| adig_s0087.g8.t1  | -                                                     | -    | -        | -        |
| adig_s0091.g43.t1 | -                                                     | -    | -        | -        |
| adig_s0091.g44.t1 | -                                                     | -    | -        | -        |
| adig_s0096.g12.t1 | Brevican core protein                                 | 37.8 | 1.4E-15  | P55068   |
| adig_s0113.g15.t1 | -                                                     | -    | -        | -        |
| adig_s0125.g55.t1 | -                                                     | -    | -        | -        |
| adig_s0130.g47.t1 | -                                                     | -    | -        | -        |
| adig_s0150.g20.t1 | Peroxidasin                                           | 36.8 | 3.9E-92  | A4IGL7   |
| adig_s0150.g21.t1 | -                                                     | -    | -        | -        |
| adig_s0164.g12.t1 | -                                                     | -    | -        | -        |
| adig_s0164.g14.t1 | -                                                     | -    | -        | -        |
| adig_s0164.g40.t1 | Isoform 5 of Microtubule-actin cross-linking factor 1 | 24.1 | 0        | Q9UPN3-4 |
| adig_s0164.g41.t1 | -                                                     | -    | -        | -        |
| adig_s0171.g21.t1 | Collagen alpha chain                                  | 47.6 | 0        | B8V7R6   |
| adig_s0181.g15.t1 | -                                                     | -    | -        | -        |
| adig_s0181.g16.t1 | -                                                     | -    | -        | -        |
| adig_s0184.g19.t1 | Microtubule-associated proteins 1A/1B light chain 3A  | 62.1 | 9E-46    | Q2HJ23   |
| adig_s0184.g20.t1 | Isoform 2 of Rho GTPase-activating protein 39         | 58.1 | 1.3E-147 | P59281-2 |

173

174

We surveyed the literature related to the annotated genes. Amino acid

175 sequences of two genes (Gene IDs: adig\_s0034.g151 and adig\_s0171.g21) were similar  
176 (Table 1) to collagen alpha chain, which is associated with skeletogenesis in *Acropora*  
177 corals (Ramos-Silva, et al. 2013). The amino acid sequence of another gene (Gene ID:  
178 adig\_s0048.g28) showed similarity (see Table 1) to a gene encoding WD repeat-  
179 containing protein 59 (WDR59).

180           To identify genes whose function is affected by differentiated SNPs, we  
181 identified amino acid changes between the two species caused by differentiated SNPs.  
182 Among 39 genes, 14 had at least one amino acid change between *A. digitifera* and  
183 *Acropora* sp. 1 (Table S4). Compared with the *A. digitifera* reference genome, *Acropora*  
184 sp. 1 had three amino acid changes in *WDR59* (Gene ID: adig\_s0048.g28) (Table S4).  
185 *WDR59* is a component of the GTPase-activating protein toward Rags (GATOR)  
186 complex, GATOR2 (Bar-Peled, et al. 2013). In *Drosophila*, GATOR2 controls meiotic  
187 entry and oocyte development (Wei, et al. 2014). Therefore, we focused further on this  
188 gene.



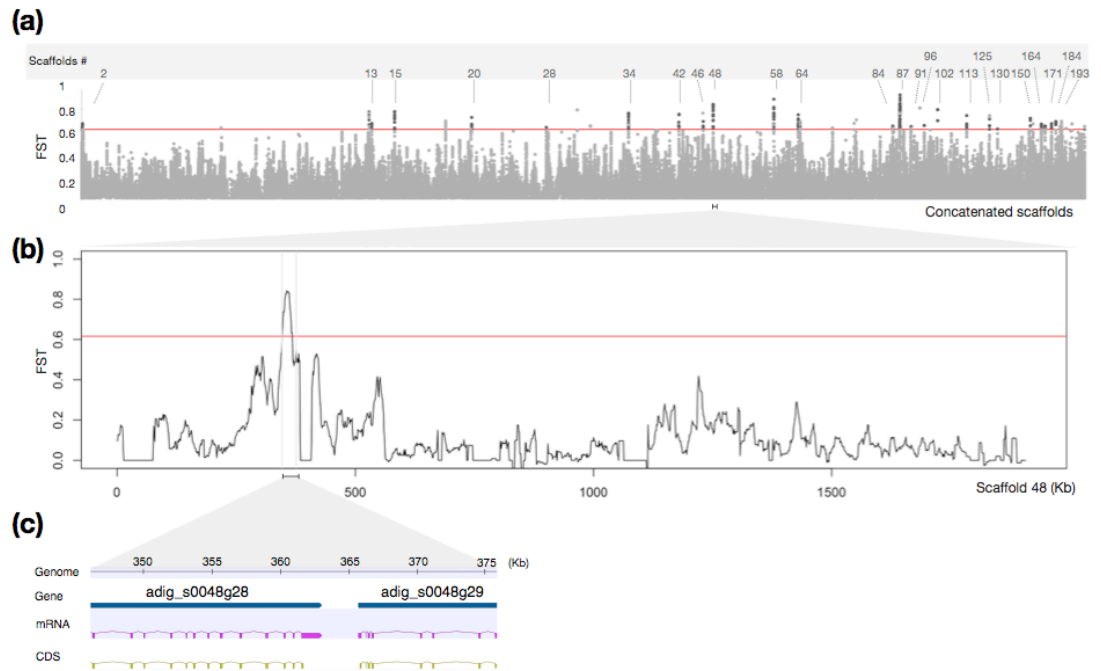

189

190

Figure 3

191 ***Differences in WDR59 between A. digitifera and Acropora sp. 1***

192 To determine whether three amino acid differences in *WDR59* between *A. digitifera* and

193 *Acropora* sp. 1 are shared with other species or are specific to *Acropora* sp. 1, we analyzed

194 *WDR59* in 15 *Acropora* species (Table S5). First, we aligned the *WDR59* sequence of 14

195 *Acropora* species (excluding *A. cytherea* due to a possible partial sequence) with that of

196 *A. digitifera* and *Acropora* sp. 1 (Figure S2) and found that one of the three amino acid

197 changes (adig\_s0048.g28.t1: CDS; 2239 C>T, amino acid sequence; Pro747Ser) is

198 specific to *Acropora* sp. 1 (Figure S2).

199           Next, we manually checked mapping reads around *WDR59* and found that  
200 *Acropora* sp. 1 colonies have a 24 bp deletion 38 bp downstream of the *Acropora* sp. 1-  
201 specific amino acid change. To verify this deletion, we amplified and sequenced the  
202 region containing the deletion by PCR from genomic DNAs of *A. digitifera* (n=7) and  
203 *Acropora* sp. 1 (n=14). We confirmed the deletion and found two additional amino acid  
204 differences between *A. digitifera* and *Acropora* sp. 1, upstream (15 bp) and downstream  
205 (14 bp) of the 24 bp deletion (Fig. S3). Among the differences between *A. digitifera* and  
206 *Acropora* sp. 1, two amino acid changes and a deletion are shared with *A. nasuta*, and one  
207 amino acid change is specific to *Acropora* sp. 1 (Figs. S4 and S5).

208           To estimate the position of the amino acid change specific to *Acropora*. sp. 1,  
209 we used Phyre2 (Kelley, et al. 2015) to search for proteins highly similar to *A. digitifera*  
210 *WDR59* in known structure databases. As a result, *S. cerevisiae* Sea3, the yeast  
211 counterpart of mammalian WDR59, was highly similar to *A. digitifera* *WDR59* (E-  
212 value=0, Identity=29%). *S. cerevisiae* Sea3 (WDR59) has an  $\alpha$ -solenoid interface region  
213 where Sea3 (WDR59) interacts with the other subunit to form a complex, Sea2 (WDR24)  
214 (Tafur, et al. 2022). The  $\alpha$ -solenoid interface region is located from amino acids 782 to

215 1,061 of *S. cerevisiae* Sea3 (WDR59) (Tafur, et al. 2022). An alignment of *A. digitifera*  
216 WDR59 with *S. cerevisiae* Sea3 (WDR59) (Fig. S6) showed that the amino acid changes  
217 specific to *Acropora* sp. 1 are located in the  $\alpha$ -solenoid interface region.

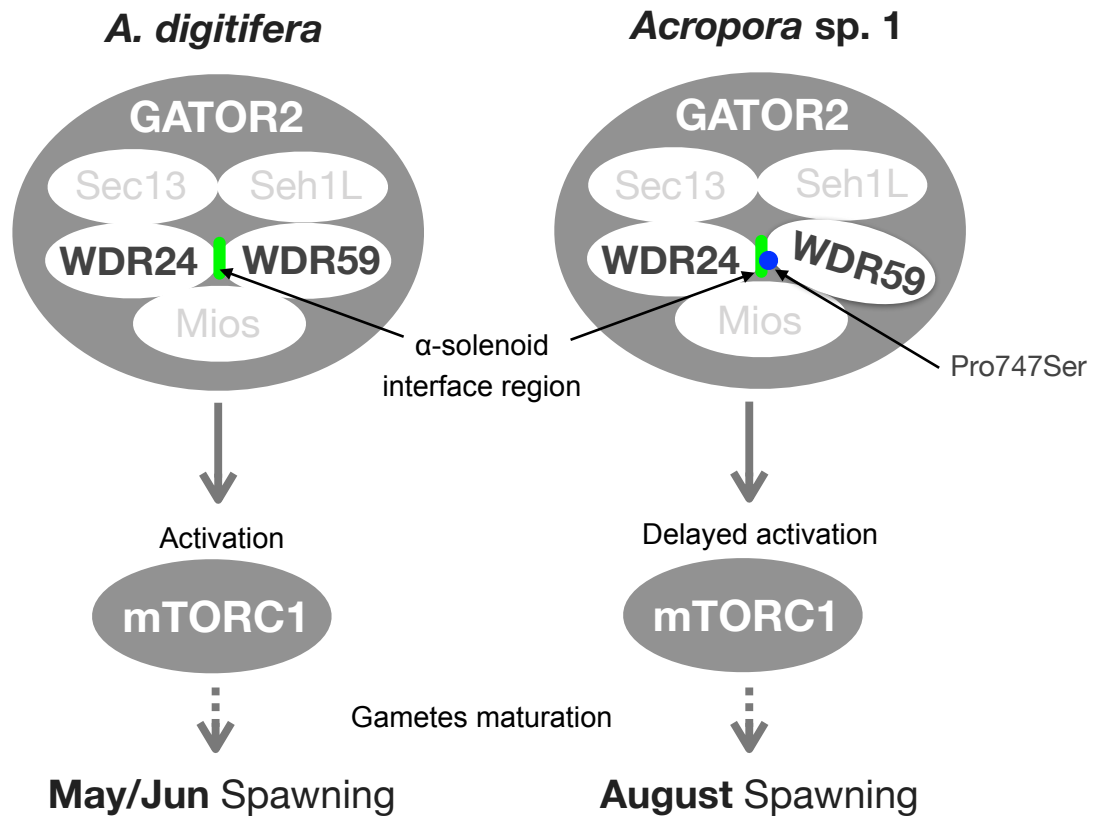

218

219 Figure 4

220 Discussion

221 *A. digitifera* and *Acropora* sp. 1 are useful for understanding timing of gametogenesis

222 in *Acropora*

223 Studying the timing of gamete maturation in corals using a population genetic approach,  
224 as in this study, provides insights into genetic mechanisms of coral gametogenesis and  
225 speciation in corals. Therefore, we propose *A. digitifera* and *Acropora* sp. 1 as a model  
226 species pair for studying mechanisms of spawning month determination and speciation  
227 in corals.

228           One of the advantages of using these two species is their clear phenotypic  
229 difference in timing of spawning. In Okinawa, *A. digitifera* spawns in May or June,  
230 whereas *Acropora* sp. 1 spawns in August (Hayashibara and Shimoike 2002; Nakajima,  
231 et al. 2012; Ohki, et al. 2015). Continuous observations of oocyte volume revealed that  
232 gamete maturation is later in *Acropora* sp. 1 than in *A. digitifera* (Hayashibara and  
233 Shimoike 2002). The difference in gamete maturation is expected to lead to reproductive  
234 isolation. Indeed, phylogenetic analysis and PCA showed that the two species are  
235 genetically differentiated, despite their low genetic differentiation. Therefore, gene flow  
236 between *A. digitifera* and *Acropora* sp. 1 is limited, which is considered an initial stage  
237 of speciation.

238           The low genetic differentiation between *A. digitifera* and *Acropora* sp. 1 is  
239 another advantage in studying genes responsible for spawning timing mechanisms and  
240 speciation. Genomic differentiation between these two species is low ( $F_{ST} = 0.10225$ ),  
241 consistent with a previous microsatellite marker study (Nakajima, et al. 2012). Using this  
242 low-genomic differentiated species pair, we identified 34 HDRs and selected 39 genes  
243 located in HDRs. These genomic regions and candidate genes may be responsible for  
244 morphological and ecological differences between the two species. Further analyses of  
245 gene expression differences in different months, functional changes resulting from highly  
246 differentiated substitutions are expected to advance research on the mechanism of  
247 spawning month determination and speciation in corals.

248

249 ***Genes that may determine morphological differentiation between two species***

250 Morphological characteristics of *Acropora* sp. 1 include shorter branches and a flatter  
251 colony shape than *A. digitifera* (Hayashibara and Shimoike 2002; Ohki, et al. 2015).  
252 These morphological differences reflect differences in skeletal form (Todd 2008). The  
253 alpha collagen-like proteins are skeletal organic matrix proteins involved in skeletal

254 formation in *Stylophora pistillata* (Drake, et al. 2013; Mummadisetti, et al. 2021) and *A.*  
255 *millepora* (Ramos-Silva, et al. 2013). In this study, we identified two alpha collagen-like  
256 genes (Gene IDs: adig\_s0034.g151 and adig\_s0171.g21) in HDRs, and these genes are  
257 likely responsible for species-specific differences in skeletal morphology. *ATOHI* (Gene  
258 ID: adig\_s0013.g139), encodes the transcription factor Atoh1, which regulates primary  
259 cilia of calcifying cells in mice (Chang, et al. 2019). Since the possibility of cilia in coral  
260 skeletogenesis has been discussed in *S. pistillata* (Tambutté, et al. 2021), *ATOHI* may  
261 help to define skeletal morphology in the two species.

262

### 263 **mTORC1 may contribute to gametogenesis of *A. digitifera***

264 In this study, we identified an amino acid change specific to *Acropora* sp. 1 in *WDR59*.  
265 *WDR59* is one of the components of a mechanistic target-of-rapamycin complex 1  
266 (mTORC1) activator, GATOR2 (Bar-Peled, et al. 2013; Wolfson, et al. 2016) (Fig. 4).  
267 mTORC1 is involved in meiotic entry and gametogenesis. Regulation of meiotic entry by  
268 mTORC1 is conserved from yeast to mammals. Downregulation of mTORC1 activity  
269 promotes the transition from mitotic to meiotic cycles in *Saccharomyces cerevisiae*,

270 *Schizosaccharomyces pombe* (van Werven and Amon 2011; Zheng and Schreiber 1997),  
271 and *Drosophila* (Wei, et al. 2014). In mice, mTORC1 is required for spermatogonial  
272 differentiation (Busada, et al. 2015) and oogenesis (Guo, et al. 2018). Activated mTORC1  
273 drives oocyte development and growth in *Drosophila* oogenesis (LaFever, et al. 2010).  
274 To the best of our knowledge, the function of mTORC1 in gametogenesis among  
275 Cnidarians has been little discussed. One exception is a study about the kinase, Mos,  
276 which regulates oocyte maturation in the jellyfish, *Clytia hemisphaerica* (Amiel, et al.  
277 2009). Treatment of oocytes with rapamycin, a potent inhibitor of mTORC1, suggested  
278 that the mTORC1 signaling pathway controls one *Mos* paralog translation during oocyte  
279 growth (Amiel, et al. 2009). Moreover, in *Hydra oligactis*, continuous exposure to  
280 rapamycin results in fewer mature sperm cells than in untreated individuals (Tomczyk, et  
281 al. 2020). Hence, mTORC1 is likely associated with gametogenesis in cnidarians,  
282 including *Acropora* species.

283           The *Acropora* sp. 1-specific amino acid change in WDR59 is located in a region  
284 where WDR59 interacts with one of the other GATOR2 components to form the complex  
285 (GATOR2). This amino acid change may cause slight differences in stability or structure

286 of GATOR2 through affinity of WDR59 with its counterpart. In *Drosophila* oogenesis,  
287 GATOR2 activates mTORC1, and active mTORC1 is required to start oocyte  
288 development (Wei, et al. 2014). Since regulation of gametogenesis by mTORC1 is  
289 reported in *Drosophila*, meiotic entry and oocyte development in *Acropora* species is also  
290 likely controlled by mTORC1 activity, regulated by GATOR2. In other words, the  
291 difference in timing of gamete maturation in *A. digitifera* and *Acropora* sp. 1  
292 (Hayashibara and Shimoike 2002) may be caused by an amino acid substitution in  
293 WDR59 that slightly affects timing of mTORC1 activation via GATOR2. Note that even  
294 though we focused on WDR59 in this study, a combination of genetic factors, including  
295 genes in other HDRs, may be responsible for differences in spawning timing. Since the  
296 phylum Cnidaria, including corals, is located in the basal lineage of the animal kingdom,  
297 studies revealing the function of mTORC1 in gametogenesis in corals will provide  
298 insights into evolution of gametogenesis regulation. Future studies of the two coral  
299 species used in this study will shed light on mechanisms that determine the timing of coral  
300 spawning.

301



## 302 **Materials and Methods**

### 303 *Specimen collection and species identification*

304 Coral samples were collected from two reefs at Okinawa, Japan, between 2018 to 2020  
305 (Table S1) with permission of the Aquaculture Agency of Okinawa Prefecture (permit  
306 numbers 30-29, 31-43, and 31-68). Sixteen colonies of *Acropora* sp. 1 with visible  
307 gametes, were collected in the field and subsequently maintained in an aquarium at the  
308 Sesoko Station, Tropical Biosphere Research Center, University of the Ryukyus. In 2018,  
309 gametes of one *Acropora* sp. 1 colony were collected during spawning, and sperm were  
310 preserved at -80°C until genome extraction. After we placed the coral colonies in the  
311 aquarium, we preserved branch fragments in RNAlater (Waltham, MA, USA) for genome  
312 extraction in 2019 and 2020.

313

### 314 *DNA extraction and sequencing*

315 We extracted genomic DNAs from 15 branch fragments originating from 15 *Acropora*  
316 sp. 1 colonies using a DNeasy Plant Mini Kit (QIAGEN, Hilden, Germany). We used  
317 DNeasy Blood & Tissue Kits (QIAGEN, Hilden, Germany) for DNA extraction from

318 sperm originating from one *Acropora* sp. 1 colony. Following the manufacturer's  
319 instructions, we constructed DNA libraries from 16 samples using an NEBNext Ultra II  
320 DNA Library Prep Kit (Illumina). The 15 libraries from branch tissues were sequenced  
321 on an Illumina HiSeqX Ten, and one library from sperm was sequenced on an Illumina  
322 HiSeq 2500.

323

#### 324 ***Mapping and variant calling***

325 We downloaded genome sequence data from 11 colonies of *A. digitifera* and 15 *Acropora*  
326 species (*A. tenuis*, *A.yongei*, *A. intermedia*, *A. gemmifera*, *A. awi*, *A. florida*, *A. millepora*,  
327 *A. selago*, *A. hyacinthus*, *A. cytherea*, *A. muricate*, *A. echinate*, *A. acuminata*, *A. nasuta*,  
328 *and A. microphthalma*). We trimmed raw sequences and removed low-quality reads  
329 before mapping with fastp (Chen, et al. 2018). Trimmed reads were mapped to the *A.*  
330 *digitifera* genome assembly ver. 2.0 (Shinzato, et al. 2021) using bowtie2 ver. 2.3.3.1  
331 (Langmead and Salzberg 2012). Among 16 *Acropora* sp. 1 colonies, we used 14 colonies  
332 with mapping bam coverage  $\geq 10$  for variant calling. Variants were called using Genome

333 Analysis Toolkit (GATK) version 4.0 and filtered according to a GATK-suggested hard-  
334 filtering with a minor modification.

335

### 336 ***PCA and molecular phylogenetic tree construction***

337 We constructed a molecular phylogenetic tree of these *Acropora* corals using phyML  
338 (Guindon, et al. 2010) with the GTR option (Guindon, et al. 2010). We performed PCA  
339 analysis of *A. digitifera* and *Acropora* sp. 1 with three species, *A. acuminata*, *A.*  
340 *microphthalma*, and *A. nasuta*, as an out-group, using PLINK v1.90 ([www.cog-  
342 genomics.org/plink/1.9/](http://www.cog-<br/>341 genomics.org/plink/1.9/)) (Weeks 2010).

342

### 343 ***Genome scan of highly differentiated regions***

344 We calculated  $F_{ST}$  (Hudson, et al. 1992) for 10-kb windows with 1 kb increments along  
345 each scaffold (>10 kb) using a sliding window approach with PopGenome (Pfeifer, et al.  
346 2014). First, we extracted 10 kb windows that included the top 0.1% of  $F_{ST}$  values. Among  
347 these top windows, we selected windows with SNPs for which the allele is fixed in one  
348 population and for which there is no homozygote for the allele in the comparison

349 population. We considered these SNPs to be differentiated SNPs. We merged overlapping  
350 regions among these selected windows and considered these connected regions highly  
351 differentiated.

352

### 353 ***Identification of genes in highly differentiated regions (HDRs)***

354 We considered genes with differentiated SNPs in HDRs as candidate genes related to  
355 phenotypic differences between the two species. To identify functional annotations of  
356 these genes, we searched orthologous genes in the NCBI nucleotide database and UniProt  
357 (Bateman, et al. 2022) by Blast search (Altschul, et al. 1990). We regarded the top hit  
358 with an  $e$ -value  $\geq 1e^{-30}$  and identity  $\geq 90\%$  for NCBI and  $e$ -value  $\geq 1e^{-4}$  and identity  $\geq$   
359 20% for UniProt as an orthologous gene.

360

### 361 ***Identification of a deletion in WDR59 among Acropora sp. 1***

362 The presence of one deletion in the WDR59 gene in *Acropora* sp. 1, discovered by visual  
363 confirmation of the mapping results, was revealed by amplifying the genomic region  
364 containing the deletion using PCR and sequencing it.

365

366 *Alignment of WDR59 sequences among Acropora species*

367 To determine whether other *Acropora* species have genetic variants other than those that  
368 differentiate *A. digitifera* and *Acropora*. sp. 1, orthologous genes of *WDR59* were  
369 searched in the reference genomes of each of the 15 *Acropora* species using Blastn  
370 (Altschul, et al. 1990). A *WDR59* sequence of *A. millepora* was downloaded from the  
371 Kyoto Encyclopedia of Genes and Genomes (KEGG).

372

373 **Acknowledgments and funding sources**

374 We thank Jun Ishida for providing the photo of *Acropora* sp. 1. We thank Ryo Kariyazono  
375 for helpful discussion. This work was supported by JSPS KAKENHI Grant Number  
376 22J40115. Computations were partially performed on the NIG supercomputer at ROIS  
377 National Institute of Genetics.

378

379 STK: research concept, all experiments, data analysis, and manuscript preparation.

380 AI: sample collection planning, species identification.

381 YT: research concept, research planning, data analysis, and manuscript preparation.

382

383 **Spell out all abbreviations**

384 CDS: Coding sequence

385 DDBJ: DNA Data Bank of Japan

386 GATK: Genome Analysis Toolkit

387 HDRs: Highly Differentiated Regions

388 KEGG: Kyoto Encyclopedia of Genes and Genomes

389 mTORC1 :mechanistic target of rapamycin complex 1

- 390 NCBI: National Center for Biotechnology Information
- 391 PCA: principal components analysis
- 392 SNP: single nucleotide polymorphism
- 393 SEA/GATOR: the Seh1 associated/GTPase-activating protein toward Rags
- 394 Sea2: SEA (*Seh1-associated*) protein complex 2
- 395 Sea3: SEA (*Seh1-associated*) protein complex 3
- 396 WDR24: WD repeat-containing protein 24
- 397 WDR59: WD repeat-containing protein 59

398

399 **References**

- 400 Altschul SF, Gish W, Miller W, Myers EW, Lipman DJ 1990. Basic local  
401 alignment search tool. *J Mol Biol.* 215: 403-410.
- 402 Amiel A, Leclere L, Robert L, Chevalier S, Houliston E 2009. Conserved  
403 functions for Mos in eumetazoan oocyte maturation revealed by studies in a  
404 cnidarian. *Current Biology* 19: 305-311.
- 405 Babcock R, et al. 1986. Synchronous spawnings of 105 scleractinian coral species  
406 on the Great Barrier Reef. *Marine Biology* 90: 379-394.
- 407 Baird AH, Guest JR, Willis BL 2009. Systematic and biogeographical patterns in  
408 the reproductive biology of scleractinian corals. *Annual review of ecology,*  
409 *evolution, and systematics* 40: 551-571.

- 410 Bar-Peled L, et al. 2013. A Tumor suppressor complex with GAP activity for the  
411 Rag GTPases that signal amino acid sufficiency to mTORC1. *Science* 340:  
412 1100-1106.
- 413 Bateman A, et al. 2022. UniProt: the Universal Protein Knowledgebase in 2023.  
414 *Nucleic Acids Research*.
- 415 Busada JT, Niedenberger BA, Velte EK, Keiper BD, Geyer CB 2015.  
416 Mammalian target of rapamycin complex 1 (mTORC1) Is required for  
417 mouse spermatogonial differentiation in vivo. *Developmental biology* 407:  
418 90-102.
- 419 Chang C-H, et al. 2019. Atoh1 controls primary cilia formation to allow for  
420 SHH-triggered granule neuron progenitor proliferation. *Developmental Cell*  
421 48: 184-199. e185.
- 422 Chen S, Zhou Y, Chen Y, Gu J 2018. fastp: an ultra-fast all-in-one FASTQ  
423 preprocessor. *Bioinformatics* 34: i884-i890.
- 424 Chiu Y-L, Shikina S, Yoshioka Y, Shinzato C, Chang C-F 2020. De novo  
425 transcriptome assembly from the gonads of a scleractinian coral, *Euphyllia*  
426 *ancora*: molecular mechanisms underlying scleractinian gametogenesis.  
427 *BMC Genomics* 21: 1-20.
- 428 Drake JL, et al. 2013. Proteomic analysis of skeletal organic matrix from the  
429 stony coral *Stylophora pistillata*. *Proceedings of the National Academy of*  
430 *Sciences* 110: 3788-3793.
- 431 Ellegren H, Sheldon BC 2008. Genetic basis of fitness differences in natural  
432 populations. *Nature* 452: 169-175.
- 433 Ellegren H, et al. 2012. The genomic landscape of species divergence in *Ficedula*  
434 *flycatchers*. *Nature* 491: 756-760.
- 435 Forrest J, Miller-Rushing AJ. 2010. Toward a synthetic understanding of the role  
436 of phenology in ecology and evolution. In: *The Royal Society*. p. 3101-3112.
- 437 Fukami H, Omori M, Shimoike K, Hayashibara T, Hatta M 2003. Ecological and  
438 genetic aspects of reproductive isolation by different spawning times in  
439 corals. *Marine Biology* 142: 679-684.
- 440 Fuller ZL, et al. 2020. Population genetics of the coral *Acropora millepora*:  
441 Toward genomic prediction of bleaching. *Science* 369.



- 442 Geraldès A, Basset P, Smith KL, Nachman MW 2011. Higher differentiation  
443 among subspecies of the house mouse (*Mus musculus*) in genomic regions  
444 with low recombination. *Molecular ecology* 20: 4722-4736.
- 445 Guindon S, et al. 2010. New algorithms and methods to estimate maximum-  
446 likelihood phylogenies: assessing the performance of PhyML 3.0. *Systematic*  
447 *biology* 59: 307-321.
- 448 Guo J, et al. 2018. Oocyte stage-specific effects of MTOR determine granulosa  
449 cell fate and oocyte quality in mice. *Proceedings of the National Academy of*  
450 *Sciences* 115: E5326-E5333.
- 451 Harrison PL. 2011. Sexual reproduction of scleractinian corals. In. *Coral reefs:*  
452 *an ecosystem in transition*: Springer. p. 59-85.
- 453 Harrison PL, et al. 1984. Mass spawning in tropical reef corals. *Science* 223:  
454 1186-1189.
- 455 Hatta M, et al. 1999. Reproductive and genetic evidence for a reticulate  
456 evolutionary history of mass-spawning corals. *Molecular Biology and*  
457 *Evolution* 16: 1607-1613.
- 458 Hatta M, Matsushima K 2008. Presumed natural hybrids between *Acropora*  
459 *donei* and *Acropora tenuis*. *Galaxea, Journal of Coral Reef Studies* 10: 91-91.
- 460 Hayashibara T, Shimoike K 2002. Cryptic species of *Acropora digitifera*. *Coral*  
461 *Reefs* 21: 224-225.
- 462 Hayashibara T, et al. 1993. Patterns of coral spawning at Akajima Island,  
463 Okinawa, Japan. *Marine Ecology Progress Series*: 253-262.
- 464 Hudson RR, Slatkin M, Maddison WP 1992. Estimation of levels of gene flow  
465 from DNA sequence data. *Genetics* 132: 583-589.
- 466 Isomura N, Iwao K, Fukami H 2013. Possible natural hybridization of two  
467 morphologically distinct species of *Acropora* (Cnidaria, Scleractinia) in the  
468 Pacific: fertilization and larval survival rates. *PLoS One* 8: e56701.
- 469 Kelley LA, Mezulis S, Yates CM, Wass MN, Sternberg MJ 2015. The Phyre2  
470 web portal for protein modeling, prediction and analysis. *Nature protocols*  
471 10: 845-858.

- 472 LaFever L, Feoktistov A, Hsu H-J, Drummond-Barbosa D 2010. Specific roles of  
473 Target of rapamycin in the control of stem cells and their progeny in the  
474 *Drosophila* ovary. *Development* 137: 2117-2126.
- 475 Langmead B, Salzberg SL 2012. Fast gapped-read alignment with Bowtie 2.  
476 *Nature methods* 9: 357-359.
- 477 Levitan DR, et al. 2004. Mechanisms of reproductive isolation among sympatric  
478 broadcast - spawning corals of the *Montastraea annularis* species complex.  
479 *Evolution* 58: 308-323.
- 480 Mercier A, Hamel J-F 2010. Synchronized breeding events in sympatric marine  
481 invertebrates: role of behavior and fine temporal windows in maintaining  
482 reproductive isolation. *Behavioral ecology and sociobiology* 64: 1749-1765.
- 483 Mummadisetti MP, Drake JL, Falkowski PG 2021. The spatial network of  
484 skeletal proteins in a stony coral. *Journal of The Royal Society Interface* 18:  
485 20200859.
- 486 Nadeau NJ, et al. 2013. Genome - wide patterns of divergence and gene flow  
487 across a butterfly radiation. *Molecular ecology* 22: 814-826.
- 488 Nakajima Y, Nishikawa A, Iguchi A, Sakai K 2012. The population genetic  
489 approach delineates the species boundary of reproductively isolated  
490 corymbose acroporid corals. *Mol Phylogenet Evol* 63: 527-531. doi:  
491 10.1016/j.ympev.2012.01.006
- 492 Ohki S, Kowalski RK, Kitanobo S, Morita M 2015. Changes in spawning time led  
493 to the speciation of the broadcast spawning corals *Acropora digitifera* and  
494 the cryptic species *Acropora* sp. 1 with similar gamete recognition systems.  
495 *Coral Reefs* 34: 1189-1198. doi: 10.1007/s00338-015-1337-4
- 496 Pfeifer B, Wittelsburger U, Ramos-Onsins SE, Lercher MJ 2014. PopGenome:  
497 an efficient Swiss army knife for population genomic analyses in R.  
498 *Molecular Biology and Evolution* 31: 1929-1936.
- 499 Poelstra JW, et al. 2014. The genomic landscape underlying phenotypic integrity  
500 in the face of gene flow in crows. *Science* 344: 1410-1414.
- 501 Ramos-Silva P, et al. 2013. The skeletal proteome of the coral *Acropora*  
502 *millepora*: the evolution of calcification by co-option and domain shuffling.  
503 *Molecular Biology and Evolution* 30: 2099-2112.

- 504 Shikina S, Chang C-F. 2016. Sexual reproduction in stony corals and insight into  
505 the evolution of oogenesis in Cnidaria. In. *The Cnidaria, past, present and*  
506 *future*: Springer. p. 249-268.
- 507 Shinzato C, et al. 2021. Eighteen coral genomes reveal the evolutionary origin of  
508 *Acropora strategies* to accommodate environmental changes. *Molecular*  
509 *Biology and Evolution* 38: 16-30.
- 510 Shinzato C, et al. 2011. Using the *Acropora digitifera* genome to understand  
511 coral responses to environmental change. *Nature* 476: 320-323. doi:  
512 10.1038/nature10249
- 513 Shlesinger T, Loya Y 2019. Breakdown in spawning synchrony: A silent threat to  
514 coral persistence. *Science* 365: 1002-1007.
- 515 Smith EG, et al. 2022. Signatures of selection underpinning rapid coral  
516 adaptation to the world's warmest reefs. *Science advances* 8: eabl7287.
- 517 Suzuki G, et al. 2020. Enhancing coral larval supply and seedling production  
518 using a special bundle collection system "coral larval cradle" for large -  
519 scale coral restoration. *Restoration Ecology* 28: 1172-1182.
- 520 Tafur L, et al. 2022. Cryo-EM structure of the SEA complex. *Nature*: 1-6.
- 521 Tambutté E, Ganot P, Venn AA, Tambutté S 2021. A role for primary cilia in  
522 coral calcification? *Cell and Tissue Research* 383: 1093-1102.
- 523 Todd PA 2008. Morphological plasticity in scleractinian corals. *Biological*  
524 *reviews* 83: 315-337.
- 525 Tomczyk S, et al. 2020. Deficient autophagy in epithelial stem cells drives aging  
526 in the freshwater cnidarian *Hydra*. *Development* 147: dev177840.
- 527 Turner TL, Hahn MW, Nuzhdin SV 2005. Genomic islands of speciation in  
528 *Anopheles gambiae*. *PLoS biology* 3: e285.
- 529 Valenstein ML, et al. 2022. Structure of the nutrient-sensing hub GATOR2.  
530 *Nature* 607: 610-616.
- 531 van Werven FJ, Amon A 2011. Regulation of entry into gametogenesis.  
532 *Philosophical Transactions of the Royal Society B: Biological Sciences* 366:  
533 3521-3531.
- 534 Veron JEN. 2000. *Corals of the World*. Townsville, Australia: Australian  
535 Institute of Marine Science.

- 536 Woolstra CR, et al. 2015. The ReFuGe 2020 Consortium—using “omics”  
537 approaches to explore the adaptability and resilience of coral holobionts to  
538 environmental change. *Frontiers in Marine Science*: 68.
- 539 Wallace C. 1999. *Staghorn corals of the world: a revision of the genus Acropora*:  
540 CSIRO publishing.
- 541 Weeks JP 2010. plink: An R package for linking mixed-format tests using IRT-  
542 based methods. *Journal of Statistical Software* 35: 1-33.
- 543 Wei Y, et al. 2014. TORC1 regulators Iml1/GATOR1 and GATOR2 control  
544 meiotic entry and oocyte development in *Drosophila*. *Proceedings of the*  
545 *National Academy of Sciences* 111: E5670-E5677.
- 546 Weir BS, Cockerham CC 1984. Estimating F-statistics for the analysis of  
547 population structure. *Evolution*: 1358-1370.
- 548 Willis B, Babcock R, Harrison PL, Wallace C 1997. Experimental hybridization  
549 and breeding incompatibilities within the mating systems of mass spawning  
550 reef corals. *Coral Reefs* 16: S53-S65.
- 551 Wolfson RL, et al. 2016. Sestrin2 is a leucine sensor for the mTORC1 pathway.  
552 *Science* 351: 43-48.
- 553 Zheng X-F, Schreiber SL 1997. Target of rapamycin proteins and their kinase  
554 activities are required for meiosis. *Proceedings of the National Academy of*  
555 *Sciences* 94: 3070-3075.

556

557

## 558 **Figure Legends**

559 Figure 1. (a) Adult colonies of *Acropora digitifera* (left) and *Acropora* sp. 1 (right). (b)

560 Sampling locations are shown as dots on the map of Okinawa Island.

561 Figure 2. Phylogenetic relationship of *Acropora* sp. 1 (a) Phylogenetic relationships of 17  
562 *Acropora* corals were analyzed based on 885,405 SNPs using the maximum likelihood method  
563 with the GTR option. Bootstrap support, shown next to each node for each clade, was obtained  
564 from 1,000 replicates. (b) PC1 and PC2 were derived from PCA based on SNPs for all individuals  
565 of *A. digitifera*, *Acropora* sp. 1, and three *Acropora* species as an out-group.

566 Figure 3. The genome-wide pattern of genetic differences between the two species. (a)  
567 Genome-wide  $F_{ST}$  values were calculated in overlapping windows of 10 kb. The red line  
568 indicates the top 0.1% of values. (b)  $F_{ST}$  was estimated across a region of scaffold 48  
569 (adig\_s0048). The red line indicates the top 0.1% of values. (c) A close-up view of  
570 predicted gene structures on an HDR in scaffold 48 (adig\_s0048). The flanking gene  
571 structure of WDR59 (Gene ID: adig\_s0048.g28) and guanine nucleotide-binding protein  
572 G(o) subunit alpha (Gene ID: adig\_s0048.g29) are indicated.

573 Figure 4. Schematic representation of a hypothesis proposed in this study. Regulation of  
574 mTORC1 by GATOR2 and components of GATOR2 is based on previous studies (Bar-  
575 Peled, et al. 2013; Valenstein, et al. 2022; Wei, et al. 2014). An *Acropora* sp. 1-specific  
576 mutation in the WDR59 / WDR24 interaction region is indicated with a blue circle.

577
